# Supplementary material for: Evaluation of Pulmonary Vein Fibrosis Following Cryoballoon Ablation of Atrial Fibrillation: A Semi-Automatic MRI Analysis
Source: MDPI journal article supplement (doi:10.3390/jcdd10090396), 2023-09-14

**Evaluation of pulmonary vein fibrosis following  
cryoballoon ablation of atrial fibrillation: a semi-  
automatic MRI analysis**

*Supplementary Material*

## **Procedural details**

Transesophageal echocardiography and a pre-procedure contrast enhanced cardiac MRI were performed in all patients to rule out atrial thrombi and study the LA morphology, respectively. All procedures were executed in conscious sedation using boluses of midazolam and fentanyl, and exclusively under fluoroscopy guidance. Surface ECG and intracardiac electrograms were recorded using EP-WorkMate (St. Jude Medical, Saint Paul, USA). Through venous femoral accesses the catheters were introduced to the heart. A diagnostic decapolar electrophysiological catheter was placed in the coronary sinus (CS), subsequently access to the LA was achieved through a patent foramen ovale or by single transseptal puncture. Heparin was administered intravenously at the moment of the transseptal puncture, and during the procedure to achieve the target activated clotting time (ACT > 350 s). A steerable 15Fr sheath (FlexCath Advance, Medtronic) was used to introduce a 28-mm cryoballoon ablation catheter (Arctic Front Advance, Medtronic) and an inner lumen mapping catheter (Achieve, Medtronic) in the LA and subsequently in each PV ostium. Complete occlusion was verified by selective venography, when no medium contrast leak back in the LA was observed. According to our standard approach, cryoenergy was delivered at each PV ostium for 180 seconds if PV isolation was achieved in less than 60 seconds, for 240 seconds for the other cases. However, the electrophysiologist was free to adopt different ablation scheme based on the temperature curve profile or other factors. Whenever the minimum temperature reached  $-55^{\circ}\text{C}$  the ablation was stopped. In order to avoid phrenic nerve palsy, during ablation of the right PVs the catheter in the CS was positioned in the right innominate vein or subclavian vein and the ipsilateral phrenic nerve paced at 800-1200 ms cycle. Cryoenergy application was immediately stopped if a loss of diaphragmatic stimulation was detected. The patients were discharged from hospital the day after ablation if the clinical conditions were stable.

## Cardiac MRI sequences acquisition parameters

### 1. Angio-MRI (non ECG-gated, 4D time resolved with keyhole 4D-TRAK)

| Parameter          | Standard value      |
|--------------------|---------------------|
| TR                 | 4,035 ms            |
| TE                 | 1,27 ms             |
| Flip Angle         | 30°                 |
| Acquisition matrix | 220*220             |
| Acquisition voxel  | 1,50/ 1,50/ 3,00 mm |
| Recon voxel        | 0,76/ 0,76/ 1,50 mm |
| FOV AP             | 330 mm              |
| FOV RL             | 330 mm              |
| FOV FH             | 112 mm              |

### 2. LGE-MRI (free breathing navigator and ECG gated inversion recovery gradient-echo sequence)

Look Locker sequences were used prior to LGE-MRI acquisition to identify the best inversion time for LGE imaging.

| 3D Inversion Recovery | Standard value      |
|-----------------------|---------------------|
| TR                    | 4,25 ms             |
| TE                    | 1,33 ms             |
| Flip angle            | 15°                 |
| IT                    | 340 ms              |
| Acquisition matrix    | 200*252             |
| Acquisition voxel     | 1,39/ 1,59/ 2,80 mm |
| Recon voxel           | 0,89/ 0,89/ 1,40 mm |

Supplementary Figure S1. Increase in LA (panel A) and PV (panel B) fibrosis after the ablation according to our dedicated workflow analysis.

A)

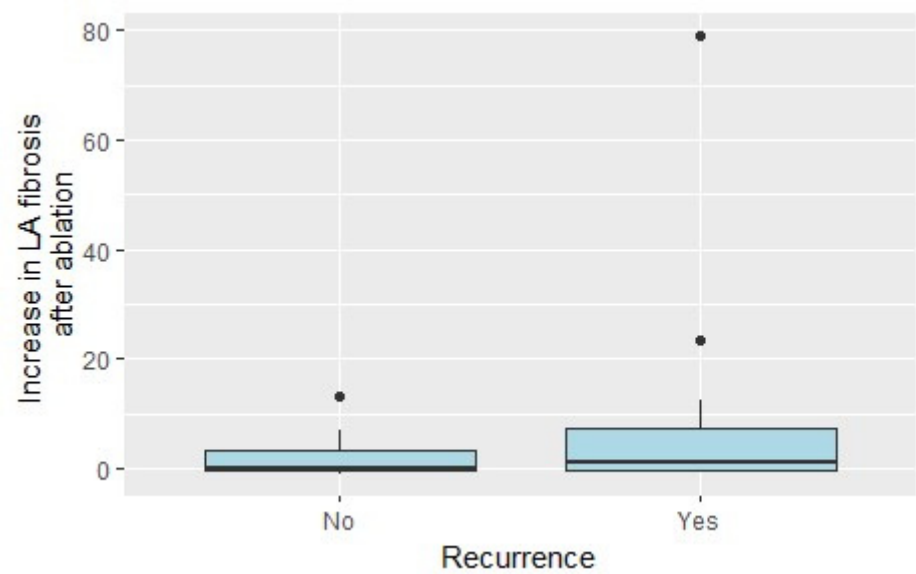

B)

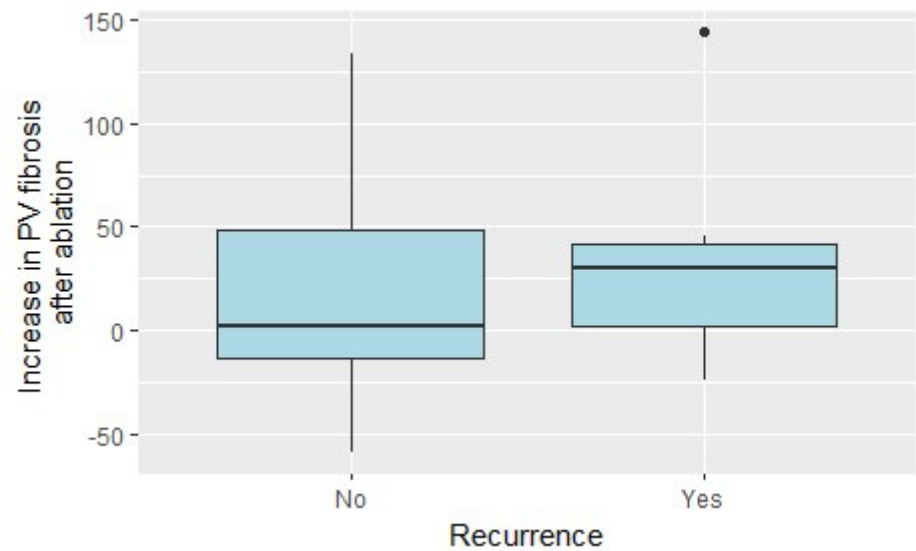

Supplementary Figure S2. Increase in LA (panel A) and PV (panel B) fibrosis after the ablation according to ADAS analysis.

A)

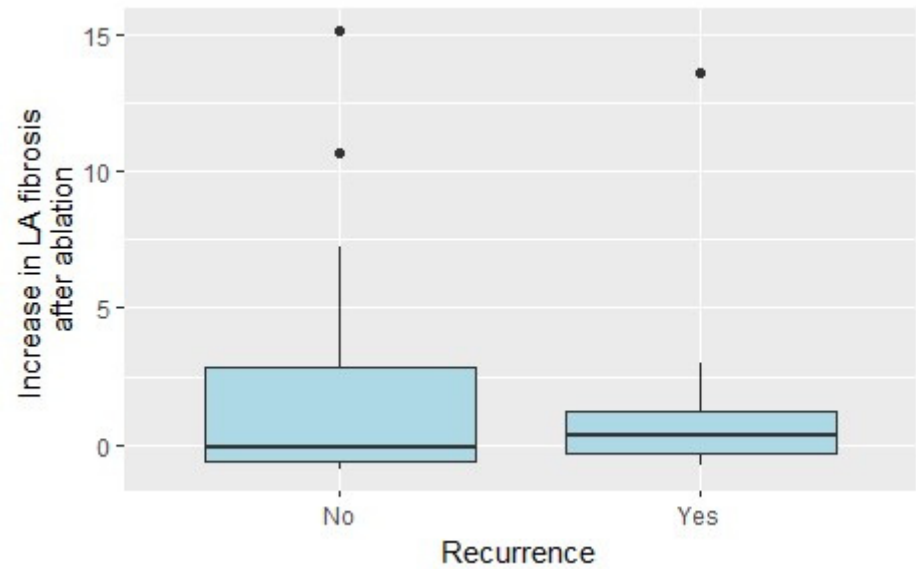

B)

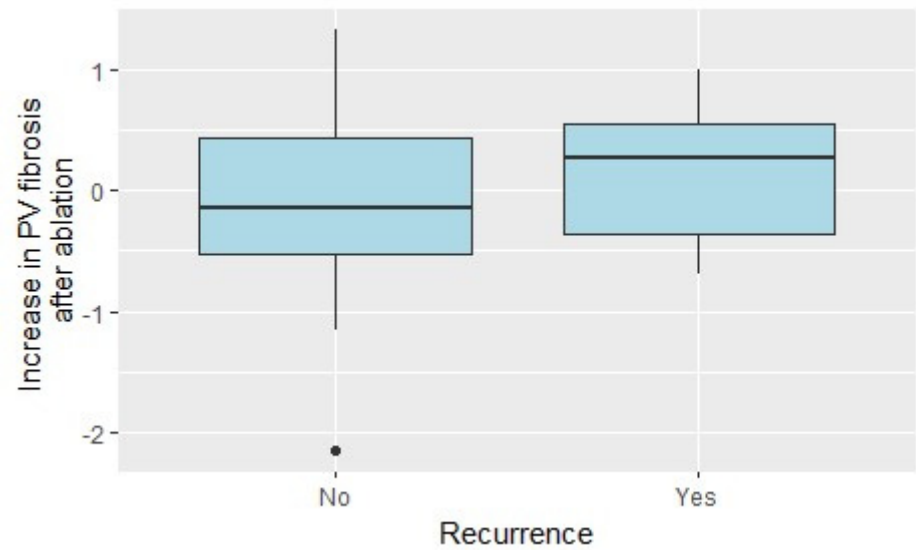

Supplement: s1 [file s1]
